# Supplementary material for: Cancer risks in a population-based study of agricultural workers: results from the Taiwan’s Farmers and Health Cohort study
Source: PubMed Central journal article supplement (PMC10821750; doi:10.5271/sjweh.4106), 2023-09-01
Supplement: SJWEH-49-419-S001.pdf [file SJWEH-49-419-S001.pdf]

# Cancer risks in a population-based study of agricultural workers: results from the Taiwan's Farmers and Health Cohort study<sup>1</sup>

by Wei-Liang Chen, MD, PhD,<sup>1, 2</sup> Gwan-Ling Lin, PhD,<sup>3</sup> Yu-Jen Lin, MSC,<sup>4</sup> Ting-Yao Su, PhD,<sup>4</sup> Chung-Ching Wang, MD, PhD,<sup>1, 2</sup> Wei-Te Wu, PhD

1. *Supplementary material*

2. *Correspondence to: Wei-Te Wu, PhD, National Institute of Environmental Health Sciences National Health Research Institutes, 35 Keyan Road, Zhunan, Miaoli County, 35053 Taiwan, ROC. [E-mail: ader.una@gmail.com]*

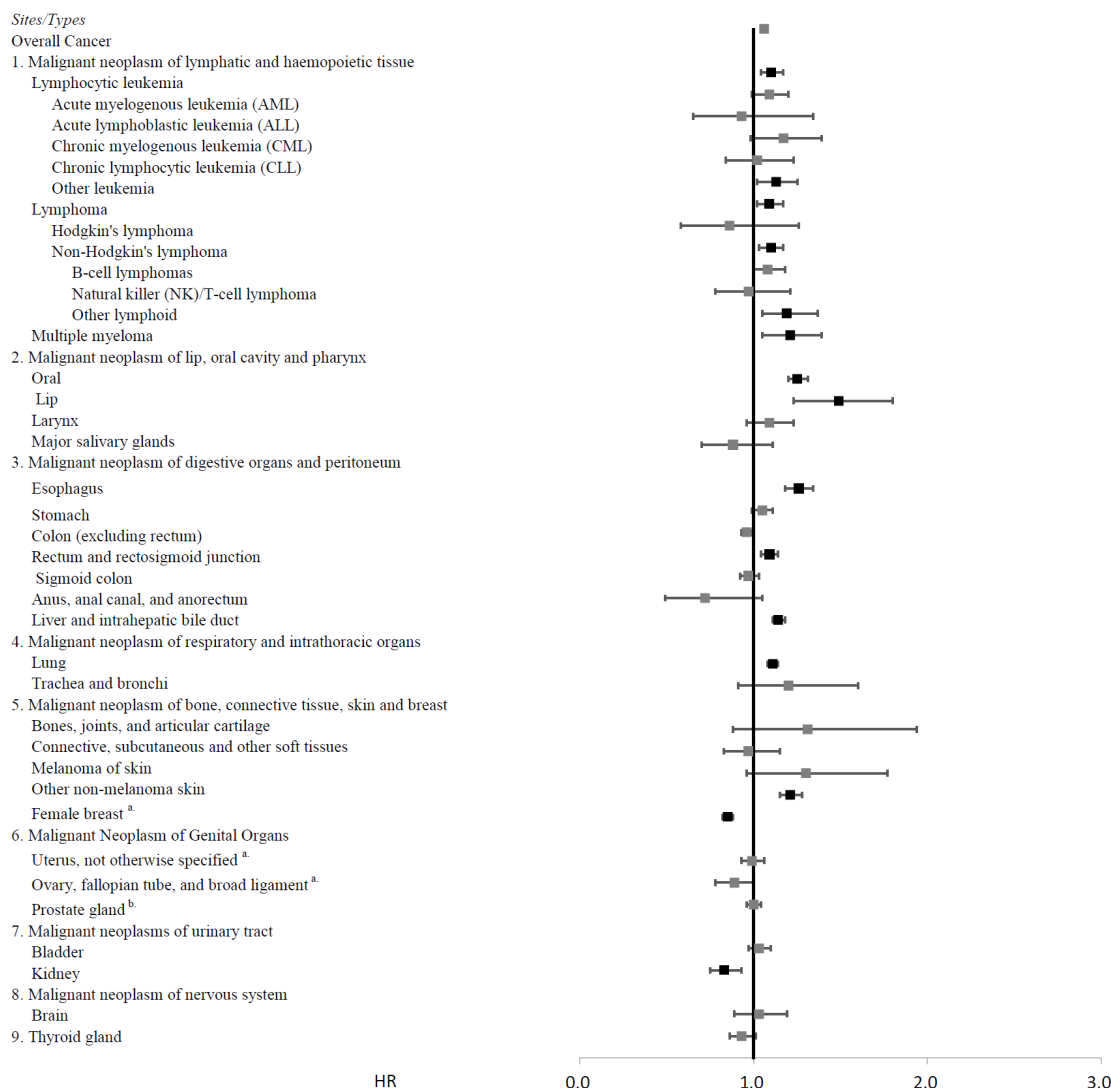

Figure S1 Adjusted Hazard Ratio and 95% confidence intervals (CI) for cancer types in agricultural workers. \* Adjusted for smoking rate, drinking rate, betel nut chewing rate, number of patients served by physicians, number of chronic beds per 10,000 populations, mammography screening rate (only in breast cancer analysis), oral mucosa examination utilization rate (only in oral and oropharyngeal cancer analysis), and ultraviolet ray exceedance rate (only in non-melanoma cancer analysis) for counties and cities

Table S1 Target outcomes based on the ICD-O-3 and the 2008 WHO classification of lymphoid neoplasms

| Sites/Types                                                | 2008 WHO Classification / ICD-O-3 Codes                                  |
|------------------------------------------------------------|--------------------------------------------------------------------------|
| Overall Cancer                                             | C00–C80                                                                  |
| 1. Malignant neoplasm of lymphatic and haemopoietic tissue |                                                                          |
| Lymphocytic leukemia                                       | C91 (M-98003 – M-99643, M-99803 – M-99893)                               |
| Lymphoma                                                   | C77 (M8000 – M9589)                                                      |
| Hodgkin’s lymphoma                                         | C77 (M96503/96513/96523/96533/96593/96613/96623/96633/96643/96653/96673) |
| Non-Hodgkin’s lymphoma                                     | C77 (M-95903 – M-95963, M-96703 – M-97293, M-97503 – M-97583, M-97643)   |
| Multiple myeloma                                           | C90.0 (M-9731–M-9732, M9734)                                             |
| 2. Malignant neoplasm of lip, oral cavity and pharynx      |                                                                          |
| Oral                                                       | C00–C06                                                                  |
| Lip                                                        | C00                                                                      |
| Larynx                                                     | C32                                                                      |
| Major salivary glands                                      | C07–C08                                                                  |
| 3. Malignant neoplasm of digestive organs and peritoneum   |                                                                          |
| Esophagus                                                  | C15                                                                      |
| Stomach                                                    | C16                                                                      |
| Colon (excluding rectum)                                   | C18                                                                      |
| Rectum and rectosigmoid junction                           | C19–C20                                                                  |
| Sigmoid colon                                              | C187                                                                     |
| Anus, anal canal, and anorectum                            | C21                                                                      |
| Liver and intrahepatic bile duct                           | C22                                                                      |

|                                                                   |                                   |
|-------------------------------------------------------------------|-----------------------------------|
| 4. Malignant neoplasm of respiratory and intrathoracic organs     |                                   |
| Lung                                                              | C34                               |
| Trachea and bronchi                                               | C339, C340                        |
| 5. Malignant neoplasm of bone, connective tissue, skin and breast |                                   |
| Bones, joints, and articular cartilage                            | C40–C41                           |
| Connective, subcutaneous and other soft tissues                   | C47, C49                          |
| Melanoma of skin                                                  | C44 (M-87203 – M-87903)           |
| Other non-melanoma skin cancer                                    | C44 (excluding M-87203 – M-87903) |
| Female breast                                                     | C50                               |
| 6. Malignant Neoplasm of Genital Organs                           |                                   |
| Uterus, not otherwise specified                                   | C55                               |
| Ovary, fallopian tube, and broad ligament                         | C56, C570–C574                    |
| Prostate gland                                                    | C61                               |
| 7. Malignant neoplasms of urinary tract                           |                                   |
| Bladder                                                           | C67                               |
| Kidney                                                            | C64                               |
| 8. Malignant neoplasm of nervous system                           |                                   |
| Brain                                                             | C71                               |
| 9. Thyroid gland                                                  | C73                               |

---

\* ICD-O-3, International Classification of Diseases for Oncology.

Table S2. Information on the overall description of the area-level variables

| Insurance Area  | Smoking rate (%) | Drinking rate (%) | Betel nut chewing rate (%) | Mammography screening rate (45-69 years old) (%) | Oral mucosa examination utilization rate (30-69 years old) (%) | Number of patients served by physicians | Number of chronic beds per 10 000 populations | Ultraviolet ray exceedance rate (%) |
|-----------------|------------------|-------------------|----------------------------|--------------------------------------------------|----------------------------------------------------------------|-----------------------------------------|-----------------------------------------------|-------------------------------------|
| Penghu County   | 16.1             | 27.1              | 3.4                        | 37.4                                             | 71.2                                                           | 767.9                                   | 7.6                                           | 74.0                                |
| Kinmen County   | 15.1             | -                 | 1.8                        | 18.5                                             | 14.7                                                           | 1,582.7                                 | 4.3                                           | 73.2                                |
| Keelung City    | 16.5             | 50.4              | 2.3                        | 45.6                                             | 33.6                                                           | 490.3                                   | 10.1                                          | 55.9                                |
| Taipei City     | 8.1              | 55.8              | 1.8                        | 41.9                                             | 53.5                                                           | 257.9                                   | 2.3                                           | 61.6                                |
| Hsinchu City    | 10.9             | 44.1              | 1.7                        | 45.9                                             | 35.0                                                           | 507.6                                   | 1.1                                           | 66.6                                |
| Hsinchu County  | 18.6             | 42.4              | 4.2                        | 43.3                                             | 43.0                                                           | 991.1                                   | 9.9                                           | 66.6                                |
| Miaoli County   | 17.8             | 38.0              | 5.3                        | 32.4                                             | 35.6                                                           | 936.6                                   | 10.1                                          | 77.0                                |
| Yilan County    | 18.5             | 35.9              | 3.5                        | 45.7                                             | 51.8                                                           | 667.5                                   | 15.2                                          | 65.8                                |
| Taoyuan City    | 10.6             | 44.7              | 2.8                        | 42.6                                             | 47.9                                                           | 551.2                                   | 6.4                                           | 68.8                                |
| Taitung County  | 17.6             | 52.9              | 11.0                       | 38.7                                             | 51.7                                                           | 734.6                                   | 7.7                                           | 75.3                                |
| Nantou County   | 22.5             | 32.4              | 6.1                        | 36.8                                             | 43.0                                                           | 770.6                                   | 17.7                                          | 71.8                                |
| Changhua County | 13.4             | 35.5              | 3.6                        | 40.5                                             | 66.1                                                           | 619.1                                   | 9.7                                           | 80.8                                |
| New Taipei City | 13.6             | 47.4              | 2.7                        | 45.8                                             | 49.5                                                           | 714.4                                   | 4.7                                           | 58.6                                |
| Chiayi County   | 15.0             | 33.7              | 6.3                        | 41.0                                             | 52.6                                                           | 639.4                                   | 9.1                                           | 82.7                                |
| Chiayi City     | 14.4             | 37.1              | 2.3                        | 42.9                                             | 59.2                                                           | 296.8                                   | 18.2                                          | 82.2                                |
| Kaohsiung City  | 12.0             | 36.7              | 3.0                        | 39.1                                             | 52.5                                                           | 430.6                                   | 5.3                                           | 78.4                                |
| Yunlin County   | 12.9             | 37.6              | 3.4                        | 29.5                                             | 41.2                                                           | 775.2                                   | 4.7                                           | 80.3                                |
| Taichung City   | 11.2             | 48.0              | 2.6                        | 37.1                                             | 59.3                                                           | 448.4                                   | 7.9                                           | 68.5                                |
| Pingtung County | 16.9             | 30.5              | 5.6                        | 35.6                                             | 60.2                                                           | 712.2                                   | 8.5                                           | 85.8                                |
| Tainan City     | 11.8             | 40.7              | 1.9                        | 40.3                                             | 57.6                                                           | 511.2                                   | 5.2                                           | 84.7                                |
| Hualien County  | 15.9             | 47.3              | 8.1                        | 36.1                                             | 80.3                                                           | 384.5                                   | 51.2                                          | 66.8                                |

Table S3 The numbers of cancer cases and corresponding hazard ratio and 95% CI for cancer types among agricultural workers

| <i>Sites/Types</i>                                         | Agricultural Workers | General Population Controls | Model 1<br>(Ref.: Controls) |              | Model 2<br>(Ref.: Controls) <sup>c</sup> |              |
|------------------------------------------------------------|----------------------|-----------------------------|-----------------------------|--------------|------------------------------------------|--------------|
|                                                            | <i>cases</i>         | <i>cases</i>                | <i>HR</i>                   | <i>95%CI</i> | <i>HR</i>                                | <i>95%CI</i> |
| Overall Cancer                                             | 136 913              | 130 248                     | 1.05                        | 1.04–1.06    | 1.06                                     | 1.05–1.07    |
| 1. Malignant neoplasm of lymphatic and haemopoietic tissue |                      |                             |                             |              |                                          |              |
| Lymphocytic leukemia                                       | 2384                 | 2179                        | 1.09                        | 1.03–1.16    | 1.10                                     | 1.04–1.17    |
| Acute myelogenous leukemia (AML)                           | 938                  | 842                         | 1.11                        | 1.01–1.22    | 1.09                                     | 0.99–1.20    |
| Acute lymphoblastic leukemia (ALL)                         | 59                   | 61                          | 0.96                        | 0.67–1.38    | 0.93                                     | 0.65–1.34    |
| Chronic myelogenous leukemia (CML)                         | 302                  | 264                         | 1.14                        | 0.97–1.35    | 1.17                                     | 0.98–1.39    |
| Chronic myelogenous leukemia (CLL)                         | 232                  | 243                         | 0.95                        | 0.80–1.14    | 1.02                                     | 0.84–1.23    |
| Other leukemia                                             | 853                  | 769                         | 1.11                        | 1.01–1.22    | 1.13                                     | 1.02–1.25    |
| Lymphoma                                                   | 3918                 | 3669                        | 1.07                        | 1.02–1.12    | 1.09                                     | 1.02–1.17    |
| Hodgkin's lymphoma                                         | 118                  | 129                         | 0.91                        | 0.71–1.17    | 0.86                                     | 0.58–1.26    |
| Non-Hodgkin's lymphoma (NHL)                               | 3800                 | 3540                        | 1.07                        | 1.03–1.12    | 1.10                                     | 1.03–1.17    |
| B-cell lymphomas                                           | 2344                 | 2216                        | 1.06                        | 0.99–1.12    | 1.08                                     | 1.00–1.18    |
| Natural killer (NK)/T-cell lymphoma                        | 377                  | 371                         | 1.02                        | 0.88–1.17    | 0.97                                     | 0.78–1.21    |
| Other lymphoid                                             | 1,079                | 953                         | 1.13                        | 1.04–1.24    | 1.19                                     | 1.05–1.37    |
| Multiple myeloma                                           | 838                  | 711                         | 1.18                        | 1.07–1.30    | 1.21                                     | 1.05–1.39    |
| 2. Malignant neoplasm of lip, oral cavity and pharynx      |                      |                             |                             |              |                                          |              |
| Oral                                                       | 8194                 | 6809                        | 1.20                        | 1.16–1.24    | 1.25                                     | 1.20–1.31    |
| Lip                                                        | 481                  | 357                         | 1.35                        | 1.17–1.54    | 1.49                                     | 1.23–1.80    |
| Larynx                                                     | 1090                 | 1095                        | 1.00                        | 0.92–1.08    | 1.09                                     | 0.96–1.23    |
| Major salivary glands                                      | 314                  | 322                         | 0.97                        | 0.83–1.14    | 0.88                                     | 0.70–1.11    |
| 3. Malignant neoplasm of digestive organs and peritoneum   |                      |                             |                             |              |                                          |              |
| Esophagus                                                  | 3790                 | 3275                        | 1.16                        | 1.10–1.21    | 1.26                                     | 1.18–1.34    |

|                                                                   |        |        |      |           |      |           |
|-------------------------------------------------------------------|--------|--------|------|-----------|------|-----------|
| Stomach                                                           | 6115   | 5945   | 1.03 | 0.99–1.07 | 1.05 | 0.99–1.11 |
| Colon (excluding rectum)                                          | 11 549 | 12 046 | 0.96 | 0.94–0.98 | 0.96 | 0.93–0.99 |
| Rectum and rectosigmoid junction                                  | 8197   | 7408   | 1.11 | 1.07–1.14 | 1.09 | 1.04–1.14 |
| Sigmoid colon                                                     | 4984   | 5059   | 0.99 | 0.95–1.03 | 0.97 | 0.92–1.03 |
| Anus, anal canal, and anorectum                                   | 92     | 153    | 0.60 | 0.46–0.78 | 0.72 | 0.49–1.05 |
| Liver and intrahepatic bile duct                                  | 19 666 | 17 523 | 1.12 | 1.10–1.14 | 1.14 | 1.11–1.18 |
| 4. Malignant neoplasm of respiratory and intrathoracic organs     |        |        |      |           |      |           |
| Lung                                                              | 17 792 | 16 293 | 1.09 | 1.07–1.12 | 1.11 | 1.08–1.14 |
| Trachea and bronchi                                               | 348    | 297    | 1.17 | 1.00–1.36 | 1.20 | 0.91–1.60 |
| 5. Malignant neoplasm of bone, connective tissue, skin and breast |        |        |      |           |      |           |
| Bones, joints, and articular cartilage                            | 121    | 110    | 1.10 | 0.85–1.42 | 1.31 | 0.88–1.94 |
| Connective, subcutaneous and other soft tissues                   | 591    | 602    | 0.98 | 0.88–1.10 | 0.97 | 0.83–1.15 |
| Melanoma of skin                                                  | 223    | 161    | 1.38 | 1.13–1.69 | 1.30 | 0.96–1.77 |
| Other non-melanoma skin cancer                                    | 5041   | 4231   | 1.19 | 1.14–1.24 | 1.21 | 1.15–1.28 |
| Female breast <sup>a</sup> .                                      | 9443   | 10 946 | 0.86 | 0.84–0.89 | 0.85 | 0.82–0.88 |
| 6. Malignant Neoplasm of Genital Organs                           |        |        |      |           |      |           |
| Uterus, not otherwise specified <sup>a</sup> .                    | 5339   | 5386   | 1.03 | 0.99–1.07 | 0.99 | 0.93–1.06 |
| Ovary, fallopian tube, and broad ligament <sup>a</sup> .          | 984    | 1135   | 0.87 | 0.80–0.94 | 0.89 | 0.78–1.00 |
| Prostate gland <sup>b</sup> .                                     | 8005   | 7931   | 1.01 | 0.98–1.04 | 1.00 | 0.96–1.04 |
| 7. Malignant neoplasms of urinary tract                           |        |        |      |           |      |           |
| Bladder                                                           | 4053   | 4016   | 1.01 | 0.97–1.05 | 1.03 | 0.97–1.10 |
| Kidney                                                            | 1154   | 1383   | 0.84 | 0.77–0.90 | 0.83 | 0.75–0.93 |
| 8. Malignant neoplasm of nervous system                           |        |        |      |           |      |           |
| Brain                                                             | 854    | 791    | 1.08 | 0.98–1.19 | 1.03 | 0.89–1.19 |
| 9. Thyroid gland                                                  | 2269   | 2283   | 0.99 | 0.94–1.05 | 0.93 | 0.86–1.01 |

<sup>a</sup>. The data was analyzed only for female subjects. <sup>b</sup>. The data was analyzed only for male subjects.

<sup>c</sup>. In Model2, we excluded participants who had been newly diagnosed with solid tumors and had not been insured for more than 10 years, as well as participants who had been newly diagnosed with hematological tumors and had not been insured for at least 2 years.
